# Supplementary material for: Multiplex Soluble Biomarker Analysis from Pleural Effusion
Source: Biomolecules. 2020 Jul 28;10(8):1113. doi: 10.3390/biom10081113 (PMC7464384; doi:10.3390/biom10081113)
Supplement: Supplementary file 1 [file biomolecules-10-01113-s001.pdf]

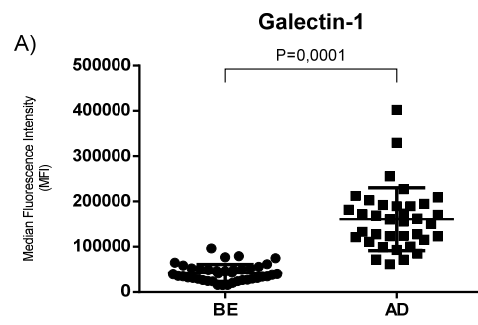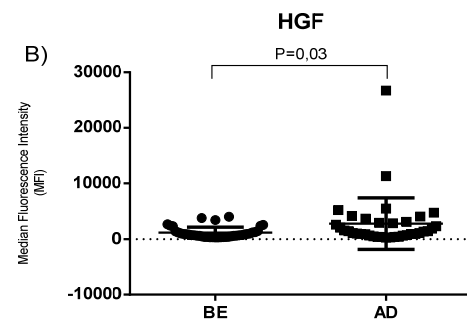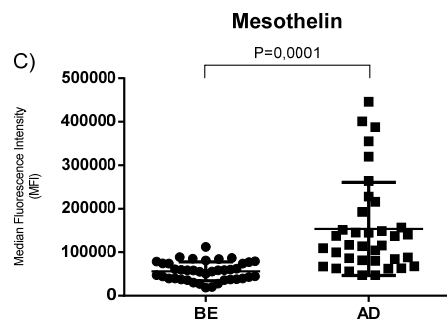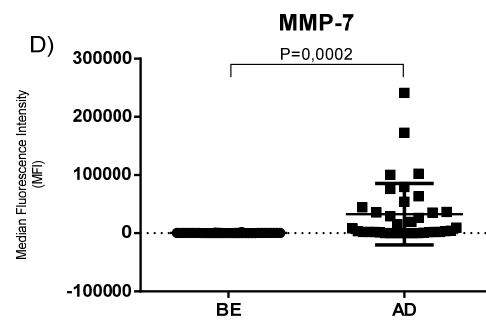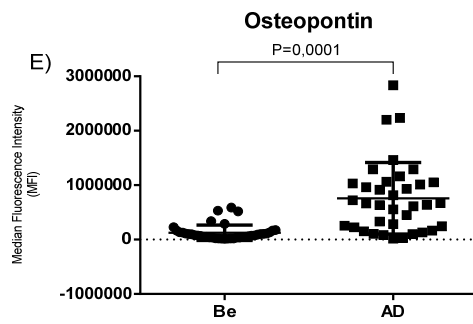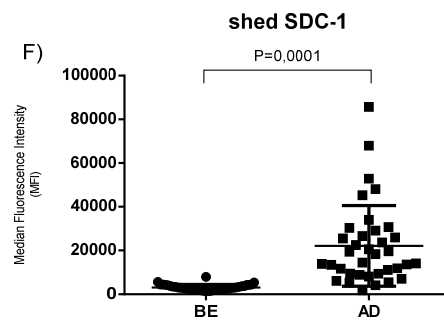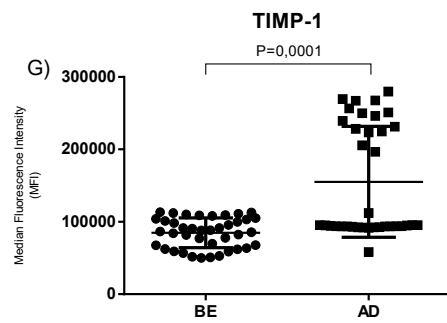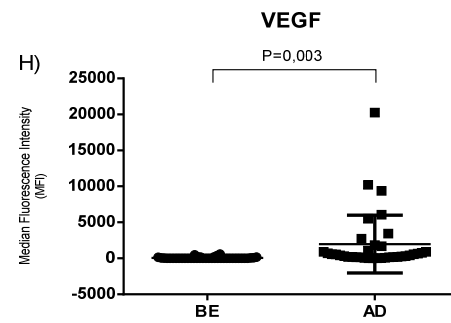

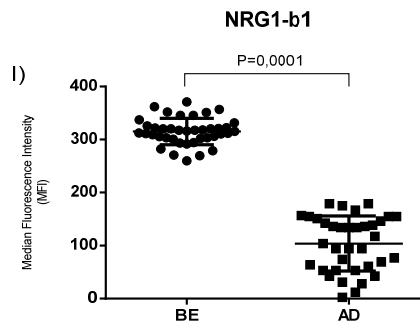

**Supplementary Figure 1.** Pleural effusion levels of diagnostic biomarkers in metastatic adenocarcinoma patients. Levels of Galectin-1, HGF, Mesothelin, MMP-7, Osteopontin, shed SDC-1, TIMP-1, VEGF are significantly higher in pleural effusion from metastatic adenocarcinoma (AD) patients ( $n = 36$ ) comparing with benign (BE) patients ( $n = 40$ ) (A–H). (I). NRG1- $\beta$ 1 has significantly lower level in AD patients comparing with BE. Significance was assessed by two-tailed  $t$ -test at  $p \leq 0.05$ .
